# Supplementary material for: Wearable-Based Stair Climb Power Estimation and Activity Classification
Source: MDPI journal article supplement (doi:10.3390/s22176600), 2022-09-01
Supplement: s1 [file s1]

## Supplementary Materials:

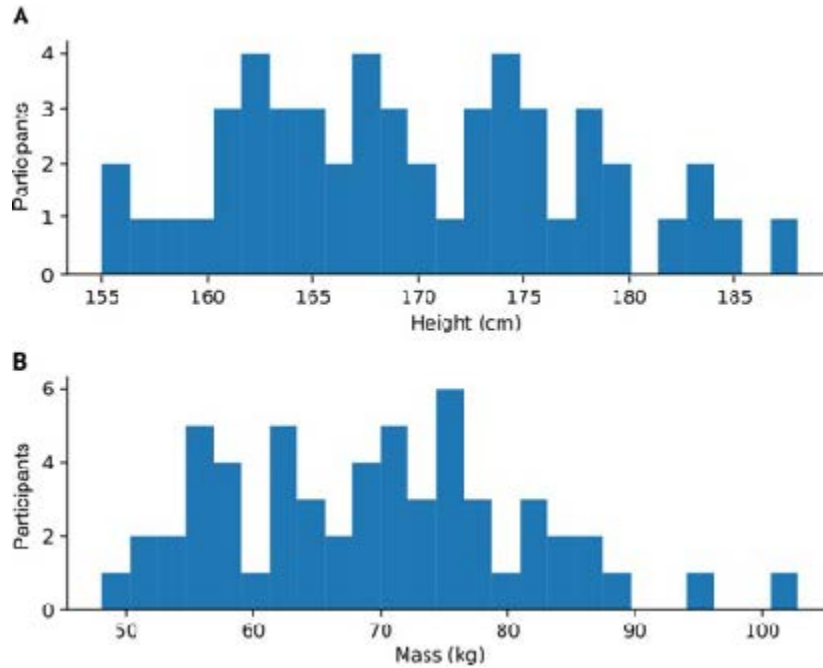

**Figure S1: (A ) Distribution of participant height (cm) and (B) the distribution of participant mass (kg)**

**Link S1: (Code Availability)** - The StairPy module outlined in this publication is available on GitHub: [https://github.com/PfizerRD/Stair\\_Climbing\\_DMTI/tree/main/stairpy/StairPy\\_Notebook](https://github.com/PfizerRD/Stair_Climbing_DMTI/tree/main/stairpy/StairPy_Notebook).

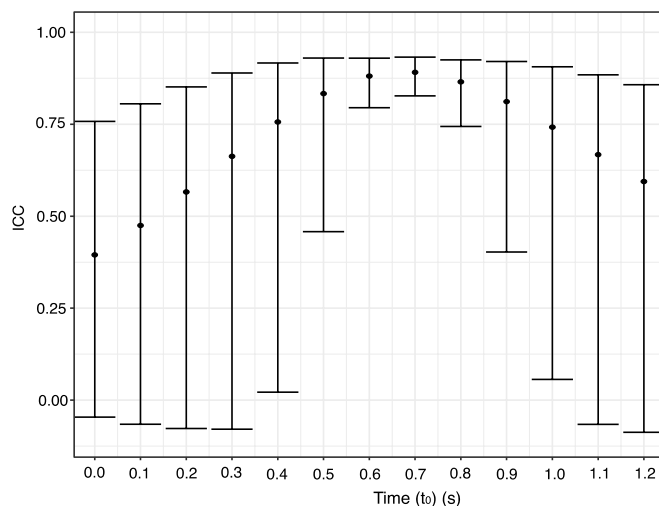

**Figure S2: Time (sec) to first step ( $t_0$ ) vs ICC value (Equation 2).** This figure shows the relationship between values for the time to first step ( $t_0$ ) vs the ICC value, which is a measure of agreement between Clinical SCP and StairPy SCP. The time to first step ( $t_0$ ) shown were applied to all subject's StairPy SCP estimation.

**Table S1:** Features used for ML classifier training

| Feature                     | Axis       | Sensors     | Domain    |
|-----------------------------|------------|-------------|-----------|
| Median                      | x, y, z    | Accel, Gyro | Time      |
| Mean                        | x, y, z    | Accel, Gyro | Time      |
| Max                         | x, y, z    | Accel, Gyro | Time      |
| Min                         | x, y, z    | Accel, Gyro | Time      |
| Standard Dev                | x, y, z    | Accel, Gyro | Time      |
| Range                       | x, y, z    | Accel, Gyro | Time      |
| Corr Coef                   | xy, xz, yz | Accel, Gyro | Time      |
| RMS                         | x, y, z    | Accel, Gyro | Time      |
| Signal Entropy              | x, y, z    | Accel, Gyro | Frequency |
| Dom. Freq. Value            | x, y, z    | Accel, Gyro | Frequency |
| Dom. Freq. Ratio            | x, y, z    | Accel, Gyro | Frequency |
| Dom. Freq. Magnitude        | x, y, z    | Accel, Gyro | Frequency |
| Spectral Flatness           | x, y, z    | Accel, Gyro | Frequency |
| Variance                    | x, y, z    | Accel, Gyro | Time      |
| FFT Energy                  | x, y, z    | Accel, Gyro | Frequency |
| Vert Power                  | y          | Accel       | Frequency |
| VAP ratio                   | z          | Accel       | Frequency |
| VMLAP Ratio                 | x, y, z    | Accel       | Frequency |
| Corr power                  | y, z       | Accel       | Frequency |
| Skewness                    | x, y, z    | Accel, Gyro | Time      |
| Kurtosis                    | x, y, z    | Accel, Gyro | Time      |
| Autocorrelation             | x, y, z    | Accel, Gyro | Time      |
| Interquartile Range         | x, y, z    | Accel, Gyro | Time      |
| Zero Crossings              | x, y, z    | Accel, Gyro | Time      |
| 20 <sup>th</sup> Percentile | x, y, z    | Accel, Gyro | Time      |
| 50 <sup>th</sup> Percentile | x, y, z    | Accel, Gyro | Time      |
| 80 <sup>th</sup> Percentile | x, y, z    | Accel, Gyro | Time      |
